# Supplementary material
Source: PubMed Central journal article supplement (PMC8493373)
Supplement: ajcr0011-4294-f9.pdf [file ajcr0011-4294-f9.pdf]

## Prognostic score of pancreatic cancer

**Table S1.** qPCR primer sequence

| Gene  | F                      | R                       |
|-------|------------------------|-------------------------|
| PHKG1 | CACCTTGAGTGAGAAGGAAACC | GAGTTTGTGCAAGGTGCAGAT   |
| HOXA4 | CACCAGGGAAAGCACAAAC    | AAGATTATATGGAGGAGGGAACG |
| ISL2  | CATCAAGTGCGCCAAGTG     | TCGATGTGGTACACGCTGTC    |
| DMRT3 | CCAAGCCAGATTTGACTG     | CCTTACTCTTTGCCACAT      |
| TRA2A | TCTGAATCCCATTCTCGATCA  | GGATCTGGATCGAGTGTAACG   |
| ACTB  | GTGGCCGAGGACTTTGATTG   | CCTGTAACAACGCATCTCATATT |

**Table S2.** Patient demographics of the long-term survivor and common clinical course patients in TCGA PDAC cohort

|                | Long-term survivor (n=4) | Common clinical course (n=76) | <i>P</i> |
|----------------|--------------------------|-------------------------------|----------|
| Sex            |                          |                               |          |
| Male           | 2 (50.0%)                | 37 (48.7%)                    | >0.999   |
| Female         | 2 (50.0%)                | 39 (51.3%)                    |          |
| Age            | 66.0±4.2                 | 65.3±11.1                     | 0.797    |
| Race           |                          |                               |          |
| CA             | 3 (75.0%)                | 68 (91.9%)                    | 0.319    |
| others         | 1 (25.0%)                | 6 (8.1%)                      |          |
| Primary Site   |                          |                               |          |
| Body/Tail      | 1 (25.0%)                | 11 (14.5%)                    | 0.485    |
| Head           | 3 (75.0%)                | 65 (85.5%)                    |          |
| Residual Tumor |                          |                               |          |
| R0             | 2 (100%)                 | 40 (56.3%)                    | 0.505    |
| R1/2           | 0 (0%)                   | 31 (43.7%)                    |          |
| Tumor Size     | 3.47±0.64                | 3.98±1.55                     | 0.299    |
| Grade          |                          |                               |          |
| G1             | 1 (25.0%)                | 8 (10.5%)                     | 0.386    |
| G2/3           | 3 (75.0%)                | 68 (89.8%)                    |          |
| pT             |                          |                               |          |
| pT1/2          | 0 (0%)                   | 10 (13.2%)                    | >0.999   |
| pT3/4          | 4 (100%)                 | 66 (86.8%)                    |          |
| pN             |                          |                               |          |
| pN0            | 1 (25.0%)                | 15 (20.0%)                    | >0.999   |
| pN1            | 3 (75.0%)                | 60 (80.0%)                    |          |
| Stage          |                          |                               |          |
| Stage I        | 0 (0%)                   | 6 (7.9%)                      | >0.999   |
| Stage II       | 4 (100%)                 | 67 (88.2%)                    |          |
| Stage III/IV   | 0 (0%)                   | 3 (76.0%)                     |          |

CA: Caucasian American.

Prognostic score of pancreatic cancer

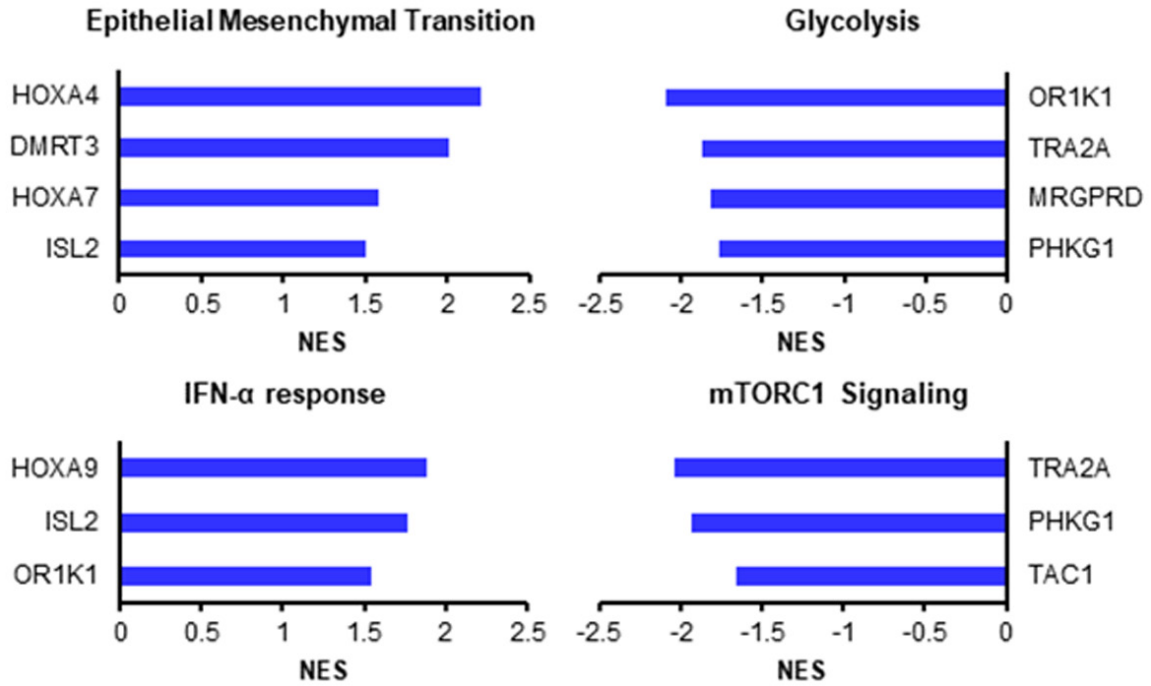

**Figure S1.** Gene set enrichment analysis (GSEA) of genes which were highly expressed in the long-term survivor. NES: normalized enrichment score.

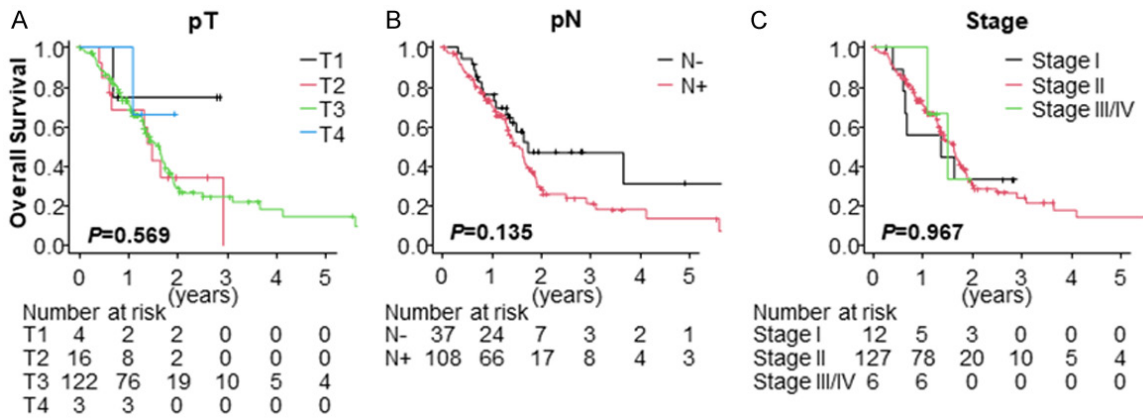

**Figure S2.** The relationship of the AJCC staging system and overall survival in TCGA PDAC cohort. A. Overall survival by pT classification. B. Overall survival by pN classification. C. Overall survival by stage.
